# Supplementary material
Source: PubMed Central journal article supplement (PMC4060670)
Supplement: 1323920111_pnas.201323920SI.pdf [file 1323920111_pnas.201323920SI.pdf]

# Supporting Information

Gideons et al. 10.1073/pnas.1323920111

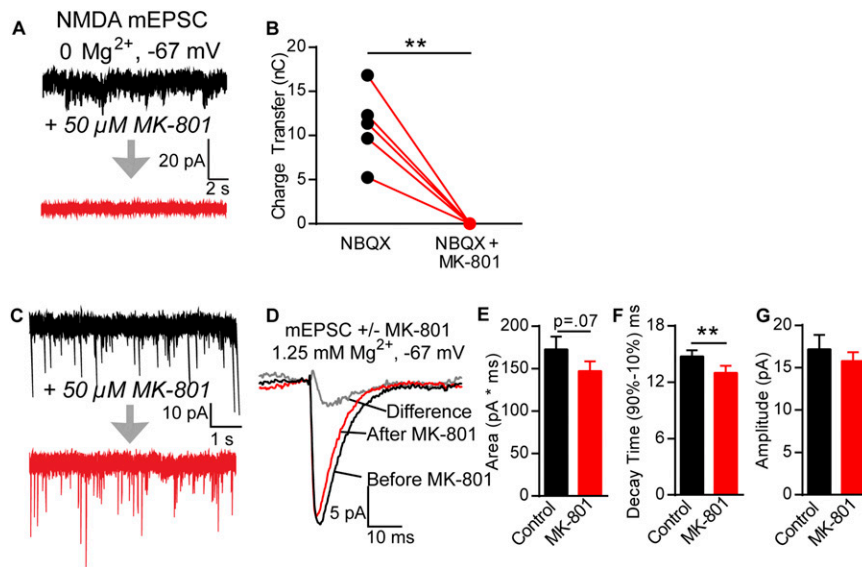

**Fig. S1.** MK-801 blocks the NMDA receptor with and without magnesium (Mg<sup>2+</sup>) present during recording. (A) Example traces recorded before and after perfusion with Dizocilpine (MK-801). (B) Application of MK-801 caused a significant decrease in charge transfer (Student's paired *t* test: *P* = 0.004, *n* = 6 coverslips). (C) Example traces of miniature excitatory postsynaptic currents (mEPSCs) recorded in 1.25 mM Mg<sup>2+</sup> before and after incubation with MK-801. (D) Average traces of 100 mEPSCs recorded before (black trace) and after (red trace) perfusion with MK-801 with the calculated difference trace (gray trace). (E–G) Perfusion of MK-801 causes an almost significant decrease in mEPSC area (Student's paired *t* test: *P* = 0.07), a significant decrease in mEPSC decay time (Student's paired *t* test: *P* = 0.003), and no change in mEPSC amplitude (Student's paired *t* test: *P* = 0.427) (*n* = 14 coverslips).
